# Supplementary material for: Genome-wide mapping of histone H3 lysine 4 trimethylation in Eucalyptus grandis developing xylem
Source: PubMed Central journal article supplement (PMC4425858; doi:10.1186/s12870-015-0499-0), 2015-05-10
Supplement: 12870_2015_499_MOESM3_ESM.pdf [file 12870_2015_499_MOESM3_ESM.pdf]

## Supplementary tables

**Table S1. ChIP-seq library sequence and mapping statistics.** Prefixes V5 and V11 refer to the two individuals sampled.

| <b>Dataset</b>        | <b>Read pairs after filtering</b> | <b>Read length after trimming</b> | <b>Read pairs uniquely mapped</b> | <b>% uniquely mapped</b> |
|-----------------------|-----------------------------------|-----------------------------------|-----------------------------------|--------------------------|
| V5_Input              | 20,846,731                        | 31 nt                             | 11,464,953                        | 55.0%                    |
| V5_H3K4me3            | 21,907,313                        | 31 nt                             | 5,707,963                         | 26.1%                    |
| V11_Input             | 11,939,885                        | 35 nt                             | 6,709,264                         | 56.2%                    |
| V11_H3K4me3           | 11,868,984                        | 35 nt                             | 3,741,400                         | 31.5%                    |
| V11_IgG <sub>2a</sub> | 11,692,593                        | 35 nt                             | 1,144,387                         | 9.8%                     |

**Table S2. Number of significant peaks shared between biological replicates and randomly subsampled pseudoreplicates**

| <b>Dataset comparison</b>          | <b>IDR threshold*</b> | <b>Number of shared peaks</b> |
|------------------------------------|-----------------------|-------------------------------|
| V5 vs V11 biological replicates    | 0.02                  | 9835                          |
| V5 within-sample pseudoreplicates  | 0.02                  | 15202                         |
| V11 within-sample pseudoreplicates | 0.02                  | 14584                         |
| Pseudoreplicates of pooled data    | 0.01                  | 18333                         |

\*IDR, Irreproducible Discovery Rate. Thresholds, which vary depending on the context, were selected based on guidelines provided by the software developers (<https://sites.google.com/site/anshulkundaje/projects/idr#TOC-IDR-PIPELINE>).

**Table S3. Putative targets of H3K4me3-regulated miRNAs in Table 1.** Targets were identified using psRNATarget [1].

| miRNA locus                    | Putative target transcript | FPKM (DSX)* | FPKM (max)† | Description‡                                                             |
|--------------------------------|----------------------------|-------------|-------------|--------------------------------------------------------------------------|
| scaffold_3:4901554..4901642    | Eucgr.A02249               | 251 802     | 1 607 587   | Glutamate synthase 1                                                     |
|                                | Eucgr.G00560               | 9 433       | 481 637     | Potassium transport 2/3                                                  |
|                                | Eucgr.G03334               | 224 530     | 477 999     | Structural maintenance of chromosomes 5                                  |
|                                | Eucgr.K01811               | 177 715     | 240 500     | Nuclear RNA polymerase A1                                                |
| scaffold_7:40119641..40119697  | Eucgr.A02400               | 124 136     | 355 397     | C2H2-type zinc finger family protein                                     |
|                                | Eucgr.E04257               | 9 893       | 162 788     | Ankyrin repeat family protein                                            |
|                                | Eucgr.E04270               | 596         | 12 859      | Ankyrin repeat family protein                                            |
|                                | Eucgr.K03411               | 172         | 29 119      | Auxin-responsive GH3 family protein                                      |
|                                | Eucgr.B03816               | 588 151     | 665 806     | Transcription factor-related                                             |
|                                | Eucgr.H00927               | 278 873     | 413 977     | S-adenosyl-L-methionine-dependent methyltransferases superfamily protein |
| scaffold_7:40120411..40120431  | Eucgr.D00906               | 104         | 11 567      | S-locus lectin protein kinase family protein                             |
|                                | Eucgr.D00895               | 0           | 8 487       | S-locus lectin protein kinase family protein                             |
|                                | Eucgr.H00013               | 0           | 984         | O-acyltransferase (WSD1-like) family protein                             |
|                                | Eucgr.C01384               | 151 500     | 225 507     | Small nuclear RNA activating complex (SNAPc), subunit SNAP43 protein     |
|                                | Eucgr.C02330               | 2 664 123   | 3 219 047   | P450 reductase 2                                                         |
|                                | Eucgr.F03969               | 283 580     | 333 211     | Magnesium transporter 2                                                  |
| scaffold_8:3505820..3505839    | Eucgr.C01226               | 438         | 14 488      | Protein of unknown function (DUF594)                                     |
|                                | Eucgr.C01222               | 0           | 16 690      | Protein of unknown function (DUF594)                                     |
|                                | Eucgr.C01227               | 1 137       | 15 738      | Protein of unknown function (DUF594)                                     |
|                                | Eucgr.C01223               | 2 992       | 17 172      | Protein of unknown function (DUF594)                                     |
|                                | Eucgr.C01221               | 182         | 5 890       | Protein of unknown function (DUF594)                                     |
|                                | Eucgr.C01219               | 506         | 20 039      | Protein of unknown function (DUF594)                                     |
|                                | Eucgr.A00874               | 51 102      | 112 657     | F-box/RNI-like superfamily protein                                       |
|                                | Eucgr.A00876               | 119 103     | 171 048     | RNI-like superfamily protein                                             |
| scaffold_9:28910581..28910654  | Eucgr.A02961               | 160 937     | 333 983     | Protein kinase family protein with ARM repeat domain                     |
|                                | Eucgr.K03271               | 17 048      | 267 828     | 2-oxoglutarate (2OG) and Fe(II)-dependent oxygenase superfamily protein  |
|                                | Eucgr.K03275               | 56 413      | 217 741     | 2-oxoglutarate (2OG) and Fe(II)-dependent oxygenase superfamily protein  |
| scaffold_11:43275663..43275749 | Eucgr.C01693               | 220 239     | 624 348     | Disease resistance protein (TIR-NBS-LRR class), putative                 |
|                                | Eucgr.E01103               | 11 802      | 58 082      | Cinnamyl-alcohol dehydrogenase                                           |
|                                | Eucgr.A01774               | 218 633     | 3 241 210   | Photosystem II reaction center PSB29 protein                             |
|                                | Eucgr.B01005               | 716 973     | 993 092     | NAD(P)-linked oxidoreductase superfamily protein                         |
|                                | Eucgr.K01262               | 620 431     | 620 431     | SCAR homolog 2                                                           |
|                                | Eucgr.G02722               | 511 932     | 760 518     | Protein of unknown function DUF455                                       |
|                                | Eucgr.E00455               | 0           | 746         | Flavin-binding monooxygenase family protein                              |
|                                | Eucgr.A00534               | 295 577     | 538 206     | AMP deaminase, putative / myoadenylate deaminase, putative               |
|                                | Eucgr.E01036               | 95 389      | 174 242     | Tetratricopeptide repeat (TPR)-like superfamily protein                  |
|                                | Eucgr.F02840               | 4 013 037   | 9 666 673   | Calmodulin like 23                                                       |
|                                | Eucgr.K01542               | 1 183       | 277 272     | Myb domain protein 56                                                    |
|                                | Eucgr.F00956               | 107 773     | 289 943     | NB-ARC domain-containing disease resistance protein                      |

\*RNA-seq data for developing secondary xylem (DSX) was obtained from EucGenIE [2]

†Maximum transcript abundance observed across seven tissues in the EucGenIE database

‡E. grandis annotation v.1.1 ([www.phytozome.net](http://www.phytozome.net))

**Table S4. Significantly overrepresented and underrepresented biological functions among H3K4-trimethylated genes**

| GO identifier   | Level(s)       | Term                                                                                | Frequency (set) | Frequency (reference) | P-value* |
|-----------------|----------------|-------------------------------------------------------------------------------------|-----------------|-----------------------|----------|
| <b>Enriched</b> |                |                                                                                     |                 |                       |          |
| GO:0044267      | 6,5            | cellular protein metabolic process                                                  | 0.1082          | 0.0842                | 1.68E-19 |
| GO:0006412      | 7,5,6          | translation                                                                         | 0.0391          | 0.0272                | 4.31E-14 |
| GO:0019538      | 5,4            | protein metabolic process                                                           | 0.1235          | 0.1016                | 2.74E-13 |
| GO:0044257      | 7,6            | cellular protein catabolic process                                                  | 0.0175          | 0.0113                | 8.99E-09 |
| GO:0043632      | 6              | modification-dependent macromolecule catabolic process                              | 0.0166          | 0.0106                | 9.16E-09 |
| GO:0006511      | 10,8,9         | ubiquitin-dependent protein catabolic process                                       | 0.0166          | 0.0106                | 9.16E-09 |
| GO:0019941      | 9,7,8          | modification-dependent protein catabolic process                                    | 0.0166          | 0.0106                | 9.16E-09 |
| GO:0051603      | 8,7            | proteolysis involved in cellular protein catabolic process                          | 0.0169          | 0.0109                | 1.15E-08 |
| GO:0044260      | 4              | cellular macromolecule metabolic process                                            | 0.2144          | 0.1929                | 4.84E-07 |
| GO:0034960      | 5              | cellular biopolymer metabolic process                                               | 0.2096          | 0.189                 | 1.72E-06 |
| GO:0034962      | 6              | cellular biopolymer catabolic process                                               | 0.02            | 0.0139                | 3.59E-06 |
| GO:0044265      | 5              | cellular macromolecule catabolic process                                            | 0.0248          | 0.018                 | 3.96E-06 |
| GO:0043170      | 3              | macromolecule metabolic process                                                     | 0.2337          | 0.2144                | 4.92E-05 |
| GO:0043283      | 4              | biopolymer metabolic process                                                        | 0.2254          | 0.2075                | 0.000245 |
| GO:0006996      | 3              | organelle organization                                                              | 0.0402          | 0.0322                | 0.000278 |
| GO:0009987      | 2              | cellular process                                                                    | 0.4105          | 0.3897                | 0.000475 |
| GO:0051649      | 4,3            | establishment of localization in cell                                               | 0.031           | 0.0244                | 0.001192 |
| GO:0046907      | 5,4            | intracellular transport                                                             | 0.0272          | 0.0211                | 0.001658 |
| GO:0016192      | 3,4,5          | vesicle-mediated transport                                                          | 0.0126          | 0.0087                | 0.001686 |
| GO:0044238      | 3              | primary metabolic process                                                           | 0.2983          | 0.2804                | 0.002255 |
| GO:0008104      | 4              | protein localization                                                                | 0.022           | 0.0167                | 0.002852 |
| GO:0044248      | 4              | cellular catabolic process                                                          | 0.0371          | 0.0302                | 0.004243 |
| GO:0045184      | 3,4,5          | establishment of protein localization                                               | 0.0205          | 0.0156                | 0.006344 |
| GO:0015031      | 4,5,6          | protein transport                                                                   | 0.0205          | 0.0156                | 0.006344 |
| GO:0006399      | 8,7            | tRNA metabolic process                                                              | 0.0083          | 0.0054                | 0.010812 |
| GO:0051641      | 3              | cellular localization                                                               | 0.0328          | 0.0267                | 0.013586 |
| GO:0016071      | 7,6            | mRNA metabolic process                                                              | 0.0077          | 0.005                 | 0.014605 |
| GO:0043038      | 6,7            | amino acid activation                                                               | 0.0061          | 0.0039                | 0.032366 |
| GO:0043039      | 7,9,8          | tRNA aminoacylation                                                                 | 0.0061          | 0.0039                | 0.032366 |
| GO:0006418      | 8,10,9,6,<br>7 | tRNA aminoacylation for protein translation                                         | 0.0061          | 0.0039                | 0.032366 |
| GO:0006066      | 4              | cellular alcohol metabolic process                                                  | 0.0131          | 0.0096                | 0.034377 |
| GO:0044237      | 3              | cellular metabolic process                                                          | 0.3046          | 0.2895                | 0.042549 |
| <b>Depleted</b> |                |                                                                                     |                 |                       |          |
| GO:0006952      | 4              | defense response                                                                    | 0.0191          | 0.0324                | 7.58E-14 |
| GO:0050896      | 2              | response to stimulus                                                                | 0.1462          | 0.1745                | 8.30E-14 |
| GO:0019748      | 3              | secondary metabolic process                                                         | 0.0099          | 0.0197                | 3.74E-12 |
| GO:0042221      | 3              | response to chemical stimulus                                                       | 0.0681          | 0.0822                | 6.65E-06 |
| GO:0015979      | 4              | photosynthesis                                                                      | 0.0049          | 0.01                  | 1.30E-05 |
| GO:0006355      | 8,7,9,6        | regulation of transcription, DNA-dependent                                          | 0.0245          | 0.0333                | 4.23E-05 |
| GO:0051252      | 7,6,5          | regulation of RNA metabolic process                                                 | 0.0248          | 0.0335                | 7.86E-05 |
| GO:0009699      | 7,6,5          | phenylpropanoid biosynthetic process                                                | 0.0032          | 0.0073                | 0.00014  |
| GO:0009698      | 6,5,4          | phenylpropanoid metabolic process                                                   | 0.0043          | 0.0087                | 0.00021  |
| GO:0006725      | 4              | cellular aromatic compound metabolic process                                        | 0.0124          | 0.0186                | 0.00042  |
| GO:0032774      | 5,7,6          | RNA biosynthetic process                                                            | 0.027           | 0.0351                | 0.00082  |
| GO:0006351      | 8,6,7          | transcription, DNA-dependent                                                        | 0.027           | 0.0351                | 0.00082  |
| GO:0065007      | 2              | biological regulation                                                               | 0.148           | 0.1636                | 0.000887 |
| GO:0042398      | 6,5            | cellular amino acid derivative biosynthetic process                                 | 0.0061          | 0.0106                | 0.00159  |
| GO:0009719      | 3              | response to endogenous stimulus                                                     | 0.0403          | 0.0495                | 0.001613 |
| GO:0006950      | 3              | response to stress                                                                  | 0.0853          | 0.0977                | 0.001633 |
| GO:0050794      | 4,3            | regulation of cellular process                                                      | 0.112           | 0.1253                | 0.002735 |
| GO:0045449      | 7,8,6          | regulation of transcription                                                         | 0.054           | 0.0638                | 0.004199 |
| GO:0010200      | 6              | response to chitin                                                                  | 0.0041          | 0.0078                | 0.004747 |
| GO:0031326      | 6,5            | regulation of cellular biosynthetic process                                         | 0.0578          | 0.0677                | 0.005027 |
| GO:0009889      | 5,4            | regulation of biosynthetic process                                                  | 0.0578          | 0.0677                | 0.005027 |
| GO:0019219      | 6,5            | regulation of nucleobase, nucleoside, nucleotide and nucleic acid metabolic process | 0.0565          | 0.0663                | 0.006397 |

|            |       |                                                  |        |        |          |
|------------|-------|--------------------------------------------------|--------|--------|----------|
| GO:0010556 | 6,5   | regulation of macromolecule biosynthetic process | 0.056  | 0.0657 | 0.006573 |
| GO:0009813 | 8,7,6 | flavonoid biosynthetic process                   | 0.0014 | 0.0039 | 0.012393 |
| GO:0019684 | 5     | photosynthesis, light reaction                   | 0.0034 | 0.0065 | 0.024446 |
| GO:0019438 | 5     | aromatic compound biosynthetic process           | 0.0068 | 0.0108 | 0.025312 |
| GO:0080090 | 5,4   | regulation of primary metabolic process          | 0.0616 | 0.0708 | 0.025989 |
| GO:0009753 | 4     | response to jasmonic acid stimulus               | 0.0052 | 0.0087 | 0.03729  |
| GO:0006575 | 5     | cellular amino acid derivative metabolic process | 0.0094 | 0.0136 | 0.040039 |
| GO:0031323 | 5,4   | regulation of cellular metabolic process         | 0.0663 | 0.0754 | 0.042139 |
| GO:0050789 | 3,2   | regulation of biological process                 | 0.1275 | 0.1392 | 0.044805 |
| GO:0006350 | 7,5   | transcription                                    | 0.0592 | 0.0679 | 0.048128 |

---

\*Bonferroni correction

**Table S5. H3K4me3 enrichment of *E. grandis* genes involved in secondary cell wall polysaccharide biosynthesis. Gene lists obtained from Myburg *et al.* [3].**

| Gene model                | H3K4me3-enriched? | <i>Arabidopsis</i> BLAST hit | <i>Arabidopsis</i> gene name | Relative expression (%)* | Absolute expression (FPKM)† |
|---------------------------|-------------------|------------------------------|------------------------------|--------------------------|-----------------------------|
| <b>SUSY</b>               |                   |                              |                              |                          |                             |
| Eucgr.C03199              | ✓                 | AT3G43190                    | SUS4                         | 46.1                     | 27 043 300                  |
| Eucgr.C00769              | ✓                 | AT3G43190                    | SUS4                         | 52.8                     | 6 929 210                   |
| Eucgr.H01094              | ✓                 | AT4G02280                    | SUS3                         | 13.9                     | 1 947 340                   |
| Eucgr.F03879              | ✓                 | AT1G80070                    | SUS2                         | 10.2                     | 682 244                     |
| Eucgr.C03205              |                   | AT3G43190                    | SUS4                         | 45.0                     | 502 145                     |
| Eucgr.D02653              | ✓                 | AT1G01040                    | SUS1                         | 17.8                     | 486 588                     |
| Eucgr.H03515              |                   | AT3G43190                    | SUS4                         | 65.0                     | 398 406                     |
| Eucgr.K00816              |                   | AT3G43190                    | SUS4                         | 50.1                     | 375 515                     |
| Eucgr.C03207              |                   | AT3G43190                    | SUS4                         | 11.9                     | 141 733                     |
| Eucgr.C03204              |                   | AT3G43190                    | SUS4                         | 39.6                     | 114 469                     |
| Eucgr.H03496              |                   | AT3G43190                    | SUS4                         | 51.4                     | 69 192                      |
| Eucgr.F03935              |                   | AT1G80070                    | SUS2                         | 10.5                     | 52 735                      |
| Eucgr.C03201              |                   | AT3G43190                    | SUS4                         | 27.7                     | 32 633                      |
| Eucgr.K03505              |                   | AT4G02280                    | SUS3                         | 28.2                     | 21 892                      |
| Eucgr.F01010              |                   | AT3G43190                    | SUS4                         | 20.7                     | 17 515                      |
| Eucgr.J01640              |                   | AT5G37180                    | SUS5                         | 2.0                      | 13 788                      |
| Eucgr.K02305              |                   | AT1G73370                    | SUS6                         | 1.5                      | 5 678                       |
| Eucgr.B01577              |                   | AT5G49190                    | SUS2                         | 7.8                      | 141                         |
| <b>Invertase</b>          |                   |                              |                              |                          |                             |
| Eucgr.F02588              | ✓                 | AT4G09510                    | CINV2                        | 21.6                     | 1 609 980                   |
| Eucgr.D02386              |                   | AT4G09510                    | CINV2                        | 0.9                      | 1 004                       |
| <b>Hexokinase</b>         |                   |                              |                              |                          |                             |
| Eucgr.B03711              | ✓                 | AT1G50460                    | HKL1                         | 27.4                     | 1 335 271                   |
| Eucgr.F01647              | ✓                 | AT1G47840                    | HXK3                         | 20.0                     | 759 403                     |
| Eucgr.C03728              | ✓                 | AT4G29130                    | HXK1                         | 18.7                     | 881 978                     |
| Eucgr.J00734              | ✓                 | AT1G50460                    | HKL1                         | 7.7                      | 658 748                     |
| Eucgr.C00983              |                   | AT2G19860                    | HXK2                         | 22.9                     | 46 104                      |
| Eucgr.C00975              |                   | AT2G19860                    | HXK2                         | 19.4                     | 2 269                       |
| Eucgr.C00559              |                   | AT2G19860                    | HXK2                         | 16.2                     | 35 175                      |
| Eucgr.C00569              |                   | AT2G19860                    | HXK2                         | 10.5                     | 5 672                       |
| <b>Phosphoglucomutase</b> |                   |                              |                              |                          |                             |
| Eucgr.G02157              | ✓                 | AT1G70730                    | PGM2                         | 35.6                     | 3 172 777                   |
| Eucgr.B02942              | ✓                 | AT1G23190                    | PGM3                         | 28.7                     | 2 983 813                   |
| Eucgr.J01084              | ✓                 | AT5G17530                    |                              | 24.9                     | 776 193                     |
| Eucgr.K00185              | ✓                 | AT5G51820                    | PGM1                         | 13.8                     | 608 346                     |
| Eucgr.H01421              |                   | AT5G17530                    |                              | 11.2                     | 227 897                     |
| Eucgr.D02001              |                   | AT5G17530                    |                              | 8.4                      | 140 299                     |
| Eucgr.L01855              |                   | AT1G70820                    |                              | 10.2                     | 8 987                       |
| Eucgr.B02929              |                   | AT1G70820                    |                              | 0.5                      | 951                         |
| <b>UGP</b>                |                   |                              |                              |                          |                             |
| Eucgr.E04308              | ✓                 | AT2G35020                    |                              | 65.5                     | 10 125 387                  |
| Eucgr.F02905              | ✓                 | AT5G17310                    | UGP2                         | 35.7                     | 7 822 697                   |
| Eucgr.D01117              | ✓                 | AT3G03250                    | UGP1                         | 14.7                     | 440 314                     |
| Eucgr.J00183              | ✓                 | AT3G56040                    | UGP3                         | 10.1                     | 112 668                     |
| <b>CESA</b>               |                   |                              |                              |                          |                             |
| Eucgr.D00476              |                   | AT4G18780                    | CESA8                        | 91.8                     | 25 758 933                  |
| Eucgr.A01324              | ✓                 | AT5G44030                    | CESA4                        | 91.3                     | 23 436 733                  |
| Eucgr.C00246              |                   | AT5G17420                    | CESA7                        | 92.7                     | 20 792 367                  |
| Eucgr.I00286              | ✓                 | AT2G21770                    | CESA9                        | 12.3                     | 3 558 470                   |
| Eucgr.G03380              | ✓                 | AT5G05170                    | CESA3                        | 17.6                     | 3 133 070                   |
| Eucgr.C02801              | ✓                 | AT4G32410                    | CESA1                        | 13.3                     | 3 021 617                   |
| Eucgr.F03635              | ✓                 | AT2G21770                    | CESA9                        | 10.3                     | 1 356 514                   |
| Eucgr.C01769              | ✓                 | AT4G32410                    | CESA1                        | 21.0                     | 1 205 310                   |
| Eucgr.J01278              | ✓                 | AT5G05170                    | CESA3                        | 21.3                     | 1 141 560                   |
| Eucgr.F04216              | ✓                 | AT5G64740                    | CESA6                        | 83.7                     | 789 956                     |
| Eucgr.C01147              |                   | AT4G32410                    | CESA1                        | 13.6                     | 299 713                     |
| Eucgr.B03971              |                   | AT2G21770                    | CESA9                        | 12.3                     | 156 770                     |
| Eucgr.H00939              | ✓                 | AT4G32410                    | CESA1                        | 12.2                     | 136 970                     |

|               |   |             |             |      |            |
|---------------|---|-------------|-------------|------|------------|
| Eucgr.J01639  |   | AT4G32410   | CESA1       | 14.8 | 121 932    |
| Eucgr.A02372  |   | AT5G05170   | CESA3       | 65.8 | 115 561    |
| Eucgr.F04212  |   | AT5G64740   | CESA6       | 69.1 | 107 544    |
| Eucgr.B01562  |   | AT2G21770   | CESA9       | 8.6  | 50 683     |
| Eucgr.H00646  |   | AT2G21770   | CESA9       | 18.1 | 42 422     |
| Eucgr.H02200  |   | AT2G21770   | CESA9       | 16.7 | 35 374     |
| Eucgr.B01532  |   | AT2G21770   | CESA9       | 6.2  | 24 751     |
| Eucgr.L02402  |   | AT4G32410   | CESA1       | 8.7  | 12 329     |
| <b>UGD</b>    |   |             |             |      |            |
| Eucgr.J01372  | ✓ | AT5G15490   | UGD3        | 44.7 | 33 666 800 |
| Eucgr.K02506  |   | AT5G15490   | UGD3        | 49.2 | 1 362 214  |
| <b>UXS</b>    |   |             |             |      |            |
| Eucgr.J00040  | ✓ | AT5G59290   | UXS3        | 61.6 | 13 448 933 |
| Eucgr.G02921  |   | AT2G28760   | UXS6        | 82.4 | 9 374 193  |
| Eucgr.H01112  | ✓ | AT3G62830   | UXS2        | 15.1 | 6 087 550  |
| Eucgr.A01221  | ✓ | AT3G53520   | UXS1        | 48.8 | 2 712 707  |
| Eucgr.B00451  |   | AT5G59290   | UXS3        | 50.6 | 192 504    |
| Eucgr.H03936  |   | AT3G62830   | UXS2        | 10.9 | 22 404     |
| <b>IRX9</b>   |   |             |             |      |            |
| Eucgr.A01172  |   | AT2G37090   | IRX9        | 89.8 | 9 605 213  |
| Eucgr.F02177  | ✓ | AT1G27600   | I9H,IRX9-L  | 54.8 | 609 183    |
| Eucgr.F00463  | ✓ | AT1G27600   | I9H,IRX9-L  | 35.2 | 494 170    |
| Eucgr.K03214  |   | AT2G37090   | IRX9        | 92.4 | 433 206    |
| Eucgr.C00584  | ✓ | AT1G27600   | I9H,IRX9-L  | 18.6 | 284 588    |
| <b>IRX10</b>  |   |             |             |      |            |
| Eucgr.G01977  | ✓ | AT1G27440   | IRX10       | 87.8 | 11 264 120 |
| Eucgr.K02191  | ✓ | AT5G61840.1 | IRX10-L     | 30.3 | 1 304 447  |
| <b>PARVUS</b> |   |             |             |      |            |
| Eucgr.F01531  | ✓ | AT3G50760   | GATL2       | 28.7 | 4 694 067  |
| Eucgr.I01882  |   | AT3G28340   | GATL10      | 23.7 | 3 587 020  |
| Eucgr.A00485  | ✓ | AT1G19300   | PARVUS      | 19.5 | 756 525    |
| Eucgr.B03054  |   | AT1G13250   | GATL3       | 12.5 | 312 388    |
| Eucgr.B02574  | ✓ | AT1G70090   | GATL9,LGT8  | 12.8 | 248 814    |
| Eucgr.L02297  |   | AT3G28340   | GATL10      | 31.8 | 144 978    |
| Eucgr.H01923  | ✓ | AT3G50760   | GATL2       | 5.6  | 112 741    |
| Eucgr.E04362  |   | AT1G02720   | GATL5       | 0.2  | 314        |
| Eucgr.E02024  |   | AT1G02720   | GATL5       | 0.2  | 255        |
| Eucgr.H01534  |   | AT3G06260   | GATL4       | 0.0  | 0          |
| Eucgr.K03408  |   | AT3G06260   | GATL4       | 0.0  | 0          |
| <b>IRX14</b>  |   |             |             |      |            |
| Eucgr.I00880  | ✓ | AT5G67230   | IRX14-L     | 57.0 | 3 409 737  |
| Eucgr.H02219  |   | AT5G67230   | IRX14-L     | 83.5 | 1 998 313  |
| <b>RWA</b>    |   |             |             |      |            |
| Eucgr.D00335  | ✓ | AT2G34410   | RWA3        | 78.4 | 12 710 067 |
| Eucgr.B03976  | ✓ | AT3G06550   | RWA2        | 27.9 | 2 686 777  |
| <b>DUF579</b> |   |             |             |      |            |
| Eucgr.I02785  |   | AT1G09610   | GXM3/1      | 91.5 | 21 452 567 |
| Eucgr.H02217  |   | AT5G67210   | IRX15-L     | 87.3 | 19 256 333 |
| Eucgr.I00888  | ✓ | AT5G67210   | IRX15-L     | 66.8 | 7 135 410  |
| Eucgr.I01644  |   | AT1G67330   |             | 91.9 | 1 889 973  |
| Eucgr.F02961  | ✓ | AT1G33800   | GXMT1       | 26.4 | 1 716 353  |
| Eucgr.H02125  |   | AT3G50220   | IRX15       | 90.5 | 563 951    |
| Eucgr.I01114  | ✓ | AT5G67210   | IRX15-L     | 4.1  | 239 701    |
| Eucgr.K02723  |   | AT4G24910   |             | 52.6 | 209 995    |
| Eucgr.G01567  | ✓ | AT5G67210   | IRX15-L     | 31.8 | 23 509     |
| <b>IRX7</b>   |   |             |             |      |            |
| Eucgr.J00384  | ✓ | AT2G28110   | FRA8,IRX7   | 56.2 | 2 854 840  |
| <b>IRX8</b>   |   |             |             |      |            |
| Eucgr.F00995  |   | AT5G54690   | GAUT12,IRX8 | 87.9 | 5 863 770  |
| <b>PGSIP</b>  |   |             |             |      |            |
| Eucgr.F00232  | ✓ | AT4G33330   | GUX2,PGSIP3 | 75.5 | 2 360 753  |
| Eucgr.H04942  |   | AT3G18660   | GUX1,PGSIP1 | 90.5 | 1 967 787  |
| Eucgr.H04216  | ✓ | AT5G18480   | PGSIP6      | 19.7 | 736 868    |
| Eucgr.F02737  | ✓ | AT1G77130   | GUX3,PGSIP2 | 15.4 | 296 346    |
| Eucgr.F04263  |   | AT1G77130   | GUX3,PGSIP2 | 57.2 | 67 996     |
| Eucgr.L01540  |   | AT1G54940   | PGSIP4      | 0.0  | 0          |

**DUF231**

|              |   |           |             |       |            |
|--------------|---|-----------|-------------|-------|------------|
| Eucgr.J00170 |   | AT2G40320 | TBL33       | 95.0  | 26 938 300 |
| Eucgr.J00985 |   | AT3G54260 | TBL36       | 34.6  | 12 160 110 |
| Eucgr.G03092 | ✓ | AT2G40320 | TBL33       | 59.4  | 6 589 177  |
| Eucgr.A00530 |   | AT5G01360 | TBL3        | 94.2  | 5 761 423  |
| Eucgr.J00196 | ✓ | AT3G55990 | ESK1,TBL29  | 78.3  | 3 219 740  |
| Eucgr.F02742 | ✓ | AT1G48880 | TBL7        | 30.1  | 2 796 013  |
| Eucgr.E00070 | ✓ | AT1G01430 | TBL25       | 71.4  | 2 027 880  |
| Eucgr.K02974 |   | AT5G01360 | TBL3        | 81.3  | 1 785 827  |
| Eucgr.F01211 |   | AT1G73140 | TBL31       | 89.0  | 1 360 880  |
| Eucgr.C03303 | ✓ | AT5G20680 | TBL16       | 37.7  | 1 239 520  |
| Eucgr.A02463 | ✓ | AT5G06700 | TBR         | 14.6  | 894 712    |
| Eucgr.D01711 | ✓ | AT4G11090 | TBL23       | 18.1  | 800 204    |
| Eucgr.H04947 | ✓ | AT1G48880 | TBL7        | 56.7  | 758 736    |
| Eucgr.B03360 |   | AT1G70230 | TBL27       | 14.4  | 611 037    |
| Eucgr.H01509 | ✓ | AT5G19160 | TBL11       | 37.4  | 535 593    |
| Eucgr.C00073 | ✓ | AT5G20590 | TBL5        | 25.0  | 516 855    |
| Eucgr.I00187 | ✓ | AT5G20680 | TBL16       | 23.3  | 430 990    |
| Eucgr.A00614 |   | AT5G01620 | TBL35       | 12.1  | 404 156    |
| Eucgr.K00144 | ✓ | AT5G51640 | TBL17, YLS7 | 19.2  | 392 996    |
| Eucgr.B01121 | ✓ | AT3G06080 | TBL10       | 11.2  | 367 683    |
| Eucgr.A02628 |   | AT3G11570 | TBL8        | 100.0 | 306 559    |
| Eucgr.I02119 |   | AT5G15900 | TBL19       | 10.4  | 287 311    |
| Eucgr.F03235 |   | AT1G29050 | TBL38       | 58.7  | 271 226    |
| Eucgr.B02240 |   | AT5G58600 | PMR5,TBL44  | 6.4   | 247 832    |
| Eucgr.L01011 |   | AT5G15900 | TBL19       | 22.7  | 227 001    |
| Eucgr.G01129 | ✓ | AT2G14530 | TBL13       | 24.0  | 224 348    |
| Eucgr.I02565 | ✓ | AT5G64470 | TBL12       | 17.9  | 224 338    |
| Eucgr.E02713 | ✓ | AT1G29050 | TBL38       | 10.7  | 184 713    |
| Eucgr.K02955 | ✓ | AT2G38320 | TBL34       | 46.2  | 173 202    |
| Eucgr.B03636 | ✓ | AT5G06700 | TBR         | 12.1  | 169 615    |
| Eucgr.K03547 | ✓ | AT3G62390 | TBL6        | 13.5  | 150 346    |
| Eucgr.A01900 | ✓ | AT2G42570 | TBL39       | 2.4   | 115 506    |
| Eucgr.H03574 |   | AT5G19160 | TBL11       | 59.1  | 106 346    |
| Eucgr.I01832 |   | AT3G28150 | TBL22       | 14.2  | 98 310     |
| Eucgr.J01893 |   | AT5G58600 | PMR5,TBL44  | 2.2   | 92 815     |
| Eucgr.F01363 |   | AT3G14850 | TBL41       | 21.1  | 90 166     |
| Eucgr.H02546 |   | AT1G60790 | TBL2        | 20.7  | 26 499     |
| Eucgr.K01184 |   | AT2G30900 | TBL43       | 11.1  | 15 165     |
| Eucgr.B03363 |   | AT1G70230 | TBL27       | 2.0   | 12 014     |
| Eucgr.F01364 |   | AT1G78710 | TBL42       | 5.5   | 2 847      |
| Eucgr.A01950 |   | AT1G29050 | TBL38       | 37.8  | 1 873      |
| Eucgr.K01183 |   | AT2G30900 | TBL43       | 3.0   | 747        |
| Eucgr.K02957 |   | AT2G38320 | TBL34       | 0.0   | 232        |
| Eucgr.A01898 |   | AT2G38320 | TBL34       | 0.0   | 0          |
| Eucgr.I02110 |   | AT5G15900 | TBL19       | 0.0   | 0          |
| Eucgr.K02575 |   | AT5G06230 | TBL9        | 0.0   | 0          |
| Eucgr.A01902 |   | AT2G31110 | TBL40       | 0.0   | 0          |
| Eucgr.I02116 |   | AT5G15900 | TBL19       | 0.0   | 0          |
| Eucgr.L01899 |   | AT5G15900 | TBL19       | 0.0   | 0          |
| Eucgr.L01896 |   | AT5G15900 | TBL19       | 0.0   | 0          |
| Eucgr.K02956 |   | AT2G38320 | TBL34       | 0.0   | 0          |
| Eucgr.K02958 |   | AT2G38320 | TBL34       | 0.0   | 0          |
| Eucgr.I02109 |   | AT5G15900 | TBL19       | 0.0   | 0          |
| Eucgr.J00171 |   | AT2G40320 | TBL33       | 0.0   | 0          |
| Eucgr.L03073 |   | AT2G38320 | TBL34       | 0.0   | 0          |
| Eucgr.A01903 |   | AT3G12060 | TBL1        | 0.0   | 0          |

\*Relative expression in developing secondary xylem. RNA-seq data obtained from EucGenIE [2].

†Absolute expression in developing secondary xylem. RNA-seq data obtained from EucGenIE [2].



**Table S6. H3K4me3 enrichment of *E. grandis* genes involved in lignin biosynthesis.** Gene lists and tandem duplication gene lists obtained from Myburg *et al.* [3].

| Gene ID        | H3K4me3-enriched? | <i>Arabidopsis</i> BLAST hit | <i>Arabidopsis</i> gene name | Relative expression (%)* | Absolute expression (FPKM)† | Tandem duplication? |
|----------------|-------------------|------------------------------|------------------------------|--------------------------|-----------------------------|---------------------|
| <b>PAL</b>     |                   |                              |                              |                          |                             |                     |
| Eucgr.J01079   |                   | AT3G53260                    | PAL2                         | 45.4                     | 6 744 160                   |                     |
| Eucgr.G02848   |                   | AT2G37040                    | PAL1                         | 80.0                     | 2 371 820                   | ✓                   |
| Eucgr.J00907   |                   | AT3G53260                    | PAL2                         | 6.8                      | 465 141                     |                     |
| Eucgr.G02852   |                   | AT3G53260                    | PAL2                         | 57.8                     | 383 305                     | ✓                   |
| Eucgr.G02850   |                   | AT3G53260                    | PAL2                         | 48.3                     | 199 783                     | ✓                   |
| Eucgr.G02851   |                   | AT3G53260                    | PAL2                         | 47.2                     | 72 363                      | ✓                   |
| Eucgr.G02849   |                   | AT3G53260                    | PAL2                         | 23.6                     | 24 912                      | ✓                   |
| Eucgr.C03570   |                   | AT3G53260                    | PAL2                         | 1.6                      | 16 124                      |                     |
| Eucgr.A01144   |                   | AT2G37040                    | PAL1                         | 7.7                      | 742                         |                     |
| <b>C4H</b>     |                   |                              |                              |                          |                             |                     |
| Eucgr.J01844   | ✓                 | AT2G30490                    | C4H                          | 53.7                     | 18 372 167                  |                     |
| Eucgr.C00065   |                   | AT2G30490                    | C4H                          | 87.0                     | 2 574 721                   |                     |
| <b>4CL</b>     |                   |                              |                              |                          |                             |                     |
| Eucgr.C02284   | ✓                 | AT1G51680                    | 4CL1                         | 57.2                     | 12 572 167                  |                     |
| Eucgr.K00087   |                   | AT1G65060                    | 4CL3                         | 3.8                      | 324 693                     |                     |
| Eucgr.B03943   |                   | AT4G05160                    |                              | 4.0                      | 242 345                     | ✓                   |
| Eucgr.F03543   |                   | AT1G20510                    | OPCL1                        | 3.8                      | 224 078                     |                     |
| Eucgr.B03502   |                   | AT1G62940                    | ACOS5                        | 6.9                      | 82 751                      |                     |
| Eucgr.K02929   |                   | AT4G05160                    |                              | 4.7                      | 57 076                      | ✓                   |
| Eucgr.D02624   |                   | AT4G19010                    |                              | 0.8                      | 31 170                      |                     |
| Eucgr.B03942   | ✓                 | AT4G05160                    |                              | 1.9                      | 14 908                      | ✓                   |
| Eucgr.B03468   |                   | AT5G63380                    |                              | 2.8                      | 2 995                       |                     |
| Eucgr.B00135   |                   | AT5G63380                    |                              | 1.2                      | 505                         | ✓                   |
| Eucgr.K02927   |                   | AT4G05160                    |                              | 1.8                      | 472                         | ✓                   |
| Eucgr.G02758   |                   | AT1G20510                    | OPCL1                        | 0.0                      | 0                           |                     |
| Eucgr.G02879   |                   | AT1G20510                    | OPCL1                        | 0.0                      | 0                           |                     |
| <b>HCT</b>     |                   |                              |                              |                          |                             |                     |
| Eucgr.J03126   | ✓                 | AT5G48930                    | HCT                          | 58.2                     | 6 624 317                   |                     |
| Eucgr.F03978   | ✓                 | AT5G48930                    | HCT                          | 56.6                     | 2 639 093                   | ✓                   |
| Eucgr.F03972   |                   | AT5G48930                    | HCT                          | 3.2                      | 7 372                       | ✓                   |
| Eucgr.F03973   |                   | AT5G48930                    | HCT                          | 0.3                      | 3 329                       | ✓                   |
| Eucgr.F03974   |                   | AT5G48930                    | HCT                          | 0.2                      | 823                         | ✓                   |
| <b>C3H</b>     |                   |                              |                              |                          |                             |                     |
| Eucgr.A02190   |                   | AT2G40890                    | CYP98A3                      | 70.4                     | 10 346 810                  | ✓                   |
| Eucgr.G03199   |                   | AT2G40890                    | CYP98A3                      | 79.5                     | 158 734                     |                     |
| Eucgr.A02188   |                   | AT2G40890                    | CYP98A3                      | 6.0                      | 48 760                      | ✓                   |
| Eucgr.A02185   |                   | AT2G40890                    | CYP98A3                      | 0.7                      | 23 518                      | ✓                   |
| <b>CCoAOMT</b> |                   |                              |                              |                          |                             |                     |
| Eucgr.G01417   | ✓                 | AT4G34050                    | CCoAOMT1                     | 69.9                     | 32 118 967                  |                     |
| Eucgr.I01134   | ✓                 | AT4G34050                    | CCoAOMT1                     | 66.3                     | 16 420 333                  |                     |
| Eucgr.F04260   |                   | AT3G62000                    |                              | 5.2                      | 65 545                      |                     |
| Eucgr.H04648   |                   | AT1G67980                    |                              | 1.6                      | 44 468                      | ✓                   |
| Eucgr.H04646   |                   | AT1G67980                    |                              | 0.1                      | 5 880                       | ✓                   |
| Eucgr.H04650   |                   | AT1G67980                    |                              | 0.6                      | 5 313                       | ✓                   |
| Eucgr.C03674   |                   | AT4G26220                    |                              | 2.2                      | 1 119                       | ✓                   |
| Eucgr.C03680   |                   | AT4G26220                    |                              | 0.8                      | 1 108                       | ✓                   |
| Eucgr.B02687   |                   | AT1G67980                    |                              | 0.0                      | 0                           |                     |
| Eucgr.H04643   |                   | AT1G67980                    |                              | 0.0                      | 0                           | ✓                   |
| Eucgr.H04644   |                   | AT1G67980                    |                              | 0.0                      | 0                           | ✓                   |
| Eucgr.C00924   |                   | AT4G26220                    |                              | 0.0                      | 0                           | ✓                   |
| Eucgr.C00925   |                   | AT4G26220                    |                              | 0.0                      | 0                           | ✓                   |
| Eucgr.C03667   |                   | AT4G26220                    |                              | 0.0                      | 0                           | ✓                   |
| Eucgr.C03668   |                   | AT4G26220                    |                              | 0.0                      | 0                           | ✓                   |
| Eucgr.C03684   |                   | AT4G26220                    |                              | 0.0                      | 0                           | ✓                   |
| Eucgr.C03939   |                   | AT4G26220                    |                              | 0.0                      | 0                           | ✓                   |
| <b>FSH</b>     |                   |                              |                              |                          |                             |                     |
| Eucgr.J02393   |                   | AT4G36220                    | CYP84A1,FAH1                 | 93.0                     | 22 535 133                  |                     |
| Eucgr.I02371   |                   | AT4G36220                    | CYP84A1,FAH1                 | 0.1                      | 1 385                       |                     |

**COMT**

|              |           |      |      |            |   |
|--------------|-----------|------|------|------------|---|
| Eucgr.A01397 | AT5G54160 | OMT1 | 82.4 | 49 992 600 | ✓ |
| Eucgr.K00951 | AT5G54160 | OMT1 | 76.7 | 7 964 113  | ✓ |
| Eucgr.F02623 | AT5G54160 | OMT1 | 64.1 | 360 953    | ✓ |
| Eucgr.K00955 | AT4G35150 |      | 58.7 | 286 001    | ✓ |
| Eucgr.F03794 | AT5G54160 | OMT1 | 4.2  | 160 802    |   |
| Eucgr.E03875 | AT5G54160 | OMT1 | 0.0  | 77 382     | ✓ |
| Eucgr.A01797 | AT4G35160 |      | 3.6  | 49 085     | ✓ |
| Eucgr.K00957 | AT5G54160 | OMT1 | 9.7  | 38 356     | ✓ |
| Eucgr.B01744 | AT5G54160 | OMT1 | 0.0  | 37 768     | ✓ |
| Eucgr.B01747 | AT5G54160 | OMT1 | 0.0  | 34 309     | ✓ |
| Eucgr.A01600 | AT3G53140 |      | 2.4  | 30 305     |   |
| Eucgr.E03874 | AT5G54160 | OMT1 | 0.0  | 27 783     | ✓ |
| Eucgr.A01796 | AT4G35160 |      | 0.4  | 21 308     | ✓ |
| Eucgr.A01846 | AT4G35160 |      | 2.4  | 19 679     |   |
| Eucgr.F02624 | AT5G54160 | OMT1 | 2.1  | 14 097     | ✓ |
| Eucgr.H03926 | AT5G54160 | OMT1 | 0.2  | 13 143     | ✓ |
| Eucgr.E01092 | AT5G54160 | OMT1 | 5.7  | 10 763     |   |
| Eucgr.A01795 | AT4G35160 |      | 13.7 | 10 104     | ✓ |
| Eucgr.K00956 | AT5G54160 | OMT1 | 16.4 | 8 380      | ✓ |
| Eucgr.E03148 | AT5G54160 | OMT1 | 3.7  | 7 030      | ✓ |
| Eucgr.H03920 | AT5G54160 | OMT1 | 0.3  | 4 248      | ✓ |
| Eucgr.K01696 | AT5G54160 | OMT1 | 14.3 | 4 182      | ✓ |
| Eucgr.H00354 | AT1G51990 |      | 0.1  | 3 581      | ✓ |
| Eucgr.H03924 | AT5G54160 | OMT1 | 0.2  | 2 951      | ✓ |
| Eucgr.A01392 | AT5G54160 | OMT1 | 0.0  | 1 752      | ✓ |
| Eucgr.E03877 | AT5G54160 | OMT1 | 0.0  | 1 716      | ✓ |
| Eucgr.E03146 | AT5G54160 | OMT1 | 3.5  | 1 692      | ✓ |
| Eucgr.H03922 | AT5G54160 | OMT1 | 0.4  | 1 337      | ✓ |
| Eucgr.A01877 | AT4G35150 |      | 4.6  | 717        | ✓ |
| Eucgr.H00356 | AT5G54160 | OMT1 | 0.0  | 705        | ✓ |
| Eucgr.A01884 | AT4G35160 |      | 1.8  | 676        | ✓ |
| Eucgr.E03341 | AT1G77520 |      | 0.6  | 539        | ✓ |
| Eucgr.A01395 | AT5G54160 | OMT1 | 0.0  | 526        | ✓ |
| Eucgr.E03339 | AT5G54160 | OMT1 | 0.7  | 464        | ✓ |
| Eucgr.A01865 | AT5G54160 | OMT1 | 12.3 | 442        | ✓ |
| Eucgr.H00348 | AT5G54160 | OMT1 | 4.2  | 418        | ✓ |
| Eucgr.A02870 | AT5G54160 | OMT1 | 0.0  | 344        |   |
| Eucgr.H00353 | AT5G54160 | OMT1 | 0.0  | 343        | ✓ |
| Eucgr.G00020 | AT5G54160 | OMT1 | 0.0  | 281        | ✓ |
| Eucgr.A01881 | AT4G35160 |      | 1.2  | 280        | ✓ |
| Eucgr.G00017 | AT5G54160 | OMT1 | 0.0  | 272        | ✓ |
| Eucgr.A01874 | AT4G35150 |      | 0.0  | 0          | ✓ |
| Eucgr.A01876 | AT4G35150 |      | 0.0  | 0          | ✓ |
| Eucgr.A01878 | AT4G35150 |      | 0.0  | 0          | ✓ |
| Eucgr.A01880 | AT4G35150 |      | 0.0  | 0          | ✓ |
| Eucgr.A01863 | AT4G35160 |      | 0.0  | 0          | ✓ |
| Eucgr.A01873 | AT4G35160 |      | 0.0  | 0          | ✓ |
| Eucgr.A01875 | AT4G35160 |      | 0.0  | 0          | ✓ |
| Eucgr.G01808 | AT4G35160 |      | 0.0  | 0          | ✓ |
| Eucgr.G01810 | AT4G35160 |      | 0.0  | 0          | ✓ |
| Eucgr.A00759 | AT5G54160 | OMT1 | 0.0  | 0          |   |
| Eucgr.A01389 | AT5G54160 | OMT1 | 0.0  | 0          | ✓ |
| Eucgr.A01394 | AT5G54160 | OMT1 | 0.0  | 0          | ✓ |
| Eucgr.A01867 | AT5G54160 | OMT1 | 0.0  | 0          | ✓ |
| Eucgr.F02625 | AT5G54160 | OMT1 | 0.0  | 0          | ✓ |
| Eucgr.H00347 | AT5G54160 | OMT1 | 0.0  | 0          | ✓ |
| Eucgr.H00349 | AT5G54160 | OMT1 | 0.0  | 0          | ✓ |
| Eucgr.H00350 | AT5G54160 | OMT1 | 0.0  | 0          | ✓ |
| Eucgr.H00351 | AT5G54160 | OMT1 | 0.0  | 0          | ✓ |
| Eucgr.H00352 | AT5G54160 | OMT1 | 0.0  | 0          | ✓ |
| Eucgr.I02810 | AT5G54160 | OMT1 | 0.0  | 0          |   |
| Eucgr.K00041 | AT5G54160 | OMT1 | 0.0  | 0          |   |
| Eucgr.K00449 | AT5G54160 | OMT1 | 0.0  | 0          |   |
| Eucgr.K00949 | AT5G54160 | OMT1 | 0.0  | 0          | ✓ |
| Eucgr.K00950 | AT5G54160 | OMT1 | 0.0  | 0          | ✓ |

|              |   |           |      |      |           |   |
|--------------|---|-----------|------|------|-----------|---|
| Eucgr.K00953 |   | AT5G54160 | OMT1 | 0.0  | 0         | ✓ |
| Eucgr.K00954 |   | AT5G54160 | OMT1 | 0.0  | 0         | ✓ |
| <b>CCR</b>   |   |           |      |      |           |   |
| Eucgr.J03114 | ✓ | AT1G15950 | CCR1 | 41.2 | 5 899 387 |   |
| Eucgr.B02222 |   | AT5G58490 |      | 30.7 | 3 293 937 |   |
| Eucgr.C01240 | ✓ | AT2G23910 |      | 16.8 | 598 960   |   |
| Eucgr.G00052 |   | AT2G02400 |      | 14.9 | 303 772   |   |
| Eucgr.F03605 | ✓ | AT2G33590 |      | 4.9  | 197 975   | ✓ |
| Eucgr.I01783 | ✓ | AT5G14700 |      | 9.5  | 152 750   |   |
| Eucgr.G02325 |   | AT1G68540 |      | 0.3  | 5 870     |   |
| Eucgr.I01552 |   | AT4G35420 | DRL1 | 1.2  | 4 890     |   |
| Eucgr.F03954 |   | AT1G15950 | CCR1 | 0.0  | 0         |   |
| <b>CAD</b>   |   |           |      |      |           |   |
| Eucgr.E01119 | ✓ | AT1G72680 | CAD1 | 18.8 | 2 092 140 | ✓ |
| Eucgr.E01117 |   | AT1G72680 | CAD1 | 20.9 | 1 482 223 | ✓ |
| Eucgr.G01350 |   | AT3G19450 | CAD4 | 40.8 | 543 344   |   |
| Eucgr.E01107 | ✓ | AT1G72680 | CAD1 | 20.6 | 351 410   | ✓ |
| Eucgr.H04903 |   | AT4G39330 | CAD9 | 2.6  | 329 604   | ✓ |
| Eucgr.E01110 |   | AT1G72680 | CAD1 | 10.2 | 87 075    | ✓ |
| Eucgr.F01680 |   | AT4G39330 | CAD9 | 1.8  | 58 938    | ✓ |
| Eucgr.F01676 |   | AT4G39330 | CAD9 | 2.3  | 24 324    | ✓ |
| Eucgr.I00570 |   | AT4G37980 | CAD7 | 0.2  | 16 613    | ✓ |
| Eucgr.E01103 |   | AT1G72680 | CAD1 | 6.4  | 11 802    | ✓ |
| Eucgr.K01941 |   | AT4G37990 | CAD8 | 15.3 | 10 945    |   |
| Eucgr.F01679 |   | AT4G39330 | CAD9 | 0.7  | 4 997     | ✓ |
| Eucgr.F01678 |   | AT4G39330 | CAD9 | 0.8  | 3 910     | ✓ |
| Eucgr.E01105 |   | AT1G72680 | CAD1 | 1.8  | 3 848     | ✓ |
| Eucgr.G02223 |   | AT4G39330 | CAD9 | 2.8  | 3 809     |   |
| Eucgr.E01115 |   | AT1G72680 | CAD1 | 0.1  | 2 242     | ✓ |
| Eucgr.E01104 |   | AT1G72680 | CAD1 | 0.5  | 839       | ✓ |
| Eucgr.E01108 |   | AT1G72680 | CAD1 | 0.2  | 696       | ✓ |
| Eucgr.D00472 |   | AT1G72680 | CAD1 | 24.6 | 659       | ✓ |
| Eucgr.F01677 |   | AT4G39330 | CAD9 | 2.8  | 436       | ✓ |
| Eucgr.D01087 |   | AT4G37980 | CAD7 | 0.4  | 319       | ✓ |
| Eucgr.D00468 |   | AT1G72680 | CAD1 | 0.0  | 0         | ✓ |
| Eucgr.D00471 |   | AT1G72680 | CAD1 | 0.0  | 0         | ✓ |
| Eucgr.D00473 |   | AT1G72680 | CAD1 | 0.0  | 0         | ✓ |
| Eucgr.D01090 |   | AT4G37980 | CAD7 | 0.0  | 0         | ✓ |
| Eucgr.E02204 |   | AT4G37980 | CAD7 | 0.0  | 0         |   |
| Eucgr.E02310 |   | AT4G37980 | CAD7 | 0.0  | 0         | ✓ |
| Eucgr.E02319 |   | AT4G37980 | CAD7 | 0.0  | 0         | ✓ |
| Eucgr.E02559 |   | AT4G37980 | CAD7 | 0.0  | 0         | ✓ |
| Eucgr.E02570 |   | AT4G37980 | CAD7 | 0.0  | 0         | ✓ |
| Eucgr.E02580 |   | AT4G37980 | CAD7 | 0.0  | 0         | ✓ |
| Eucgr.H02411 |   | AT4G37980 | CAD7 | 0.0  | 0         | ✓ |
| Eucgr.H02434 |   | AT4G37980 | CAD7 | 0.0  | 0         | ✓ |
| Eucgr.D01088 |   | AT4G37980 | CAD7 | 0.0  | 0         | ✓ |
| Eucgr.D01089 |   | AT4G37990 | CAD8 | 0.0  | 0         | ✓ |
| Eucgr.H02433 |   | AT4G37990 | CAD8 | 0.0  | 0         | ✓ |
| Eucgr.I00571 |   | AT4G37990 | CAD8 | 0.0  | 0         | ✓ |
| Eucgr.I00572 |   | AT4G37990 | CAD8 | 0.0  | 0         | ✓ |
| Eucgr.I00573 |   | AT4G37990 | CAD8 | 0.0  | 0         | ✓ |
| Eucgr.D01091 |   | AT4G39330 | CAD9 | 0.0  | 0         | ✓ |
| Eucgr.H02412 |   | AT4G39330 | CAD9 | 0.0  | 0         | ✓ |
| Eucgr.H02414 |   | AT4G39330 | CAD9 | 0.0  | 0         | ✓ |
| Eucgr.H02415 |   | AT4G39330 | CAD9 | 0.0  | 0         | ✓ |
| Eucgr.H02431 |   | AT4G39330 | CAD9 | 0.0  | 0         | ✓ |
| Eucgr.D01086 |   | AT4G39330 | CAD9 | 0.0  | 0         | ✓ |

\*Relative expression in developing secondary xylem. RNA-seq data obtained from EucGenIE [2].

†Absolute expression in developing secondary xylem. RNA-seq data obtained from EucGenIE [2].

**Table S7. List of primers used for qPCR analysis**

| Locus                              | Annotation                 | Primers                                                     | Amplicon length (bp) |
|------------------------------------|----------------------------|-------------------------------------------------------------|----------------------|
| scaffold_8:33,795,824-33,795,938   | Eucgr.H02469               | 5'-GATCGAGAGTTCGGCGCATA-3'<br>5'-CATACGCCACTGCAGGCAAT-3'    | 134                  |
| scaffold_9:38,403,849-38,403,997   | Eucgr.I02739               | 5'-CATGCTCATTCTCCGCATGT-3'<br>5'-GTCACITTCACCTTCCTCTC-3'    | 149                  |
| scaffold_8:66,987,046-66,987,137   | Eucgr.H04673               | 5'-CTGGCGTTGGATAACAATGTT-3'<br>5'-TGGTGCTAAGAAGGTTGTCA-3'   | 111                  |
| scaffold_1:21,274,282-21,274,366   | Eucgr.A01324               | 5'-GTGCAAATGACTCCCAAGAA-3'<br>5'-GATCAGATCACCGAGGACAA-3'    | 104                  |
| scaffold_3:5,079,522-5,079,592     | Eucgr.C00246               | 5'-TTGAGCGTTATCGTCATCCT-3'<br>5'-GAGCAGAACAAGCACAAGTA-3'    | 90                   |
| scaffold_4:8,617,282-8,617,403     | Eucgr.D00476               | 5'-GTTGCTCAGTCATGGCATT-3'<br>5'-TAGGGCCTAAGACCAAACAC-3'     | 141                  |
| scaffold_10:3,764,427..3,764,590   | Eucgr.J00384               | 5'-TAGCCGTGCAAGAGCCTCAT-3'<br>5'-TTCATCATCACCGCCATCGC-3'    | 183                  |
| scaffold_9:18,069,028..18,069,166  | Eucgr.I00880               | 5'-GCACAATTCTGCTCCGATGA-3'<br>5'-AGTGCAAGGCTGTGAATCTC-3'    | 158                  |
| scaffold_10:38,339,144..38,339,239 | Eucgr.J03126               | 5'-ATGGCCGATTGAGATTGAC-3'<br>5'-AGCTTCCGAAGCTCCAATGT-3'     | 115                  |
| scaffold_5:11,792,297..11,792,357  | Eucgr.E01107               | 5'-ATTCAGCGCATACACAACA-3'<br>5'-GAAGTGTTTCATGCGAGACAG-3'    | 80                   |
| scaffold_5:11,291,880..11,292,032  | Eucgr.E01053               | 5'-TCACGTCCAAGTCGATCTTC-3'<br>5'-GCTGAGCATACAGCTCGTTA-3'    | 172                  |
| scaffold_11:13,335,435..13,335,577 | Eucgr.K01061               | 5'-ACCAAGACGACTATGCTAGAA-3'<br>5'-CACCGCCATCCAACAATAA-3'    | 161                  |
| scaffold_4:30,695,364..30,695,525  | Eucgr.D01671               | 5'-GCAGCGTCTGGATCAGATA-3'<br>5'-AATGTCCTCAAGCCGGTCTC-3'     | 181                  |
| scaffold_10:29,822,933..29,823,118 | Eucgr.J02393               | 5'-GCGATCAAGATGTGCATACC-3'<br>5'-GGTGAACCGAGCAAGATTAG-3'    | 205                  |
| scaffold_1:22,485,326..22,485,482  | Eucgr.A01397               | 5'-TGGTCCGCGTAATATGATGG-3'<br>5'-TGGTGGTGAGAATTGCAGAG-3'    | 176                  |
| scaffold_11:11,514,296..11,514,420 | Eucgr.K00951               | 5'-ACTGCATCAGCATGTGGTAT-3'<br>5'-AGTGCCGAGATCATTAAGT-3'     | 144                  |
| scaffold_8:58,195,203..58,195,428  | Intergenic<br>(Negative 1) | 5'-CTCGACTGTGAAGAGCTATC-3'<br>5'-CAGAGTAGCCATTCTCAAGG-3'    | 245                  |
| scaffold_11:13,340,627..13,340,821 | Intergenic<br>(Negative 2) | 5'-ATATGGTGTACATTGCATCAG-3'<br>5'-ATCGGCTAATGTCTCAATCAAG-3' | 216                  |

## References

1. Dai X, Zhao PX: **psRNATarget: A plant small RNA target analysis server**. *Nucleic Acids Research* 2011, **39**.suppl 2:W155-W159.
2. Hefer C, Mizrahi E, Joubert F, Myburg A: **The *Eucalyptus* genome integrative explorer (EucGenIE): a resource for *Eucalyptus* genomics and transcriptomics**. *BMC Proceedings* 2011, **5**(Suppl 7):O49.

3. Myburg AA, Grattapaglia D, Tuskan GA, Hellsten U, Hayes RD, Grimwood J, Jenkins J, Lindquist E, Tice H, Bauer D *et al*: **The genome of *Eucalyptus grandis* - a global tree for fiber and energy**. *Nature* 2014, **510**:356-362.
